# Supplementary material for: Gate-controlled ambipolar transport in b-AsP crystals and their VIS-NIF photodetection
Source: Royal Society of Chemistry journal article supplement (doi:10.1039/d1nr01715b), 2021-01-01
Supplement: d1nr01715b1.pdf [file d1nr01715b1.pdf]

## Gate-controlled Ambipolar Transport in b-AsP Crystal and Its VIS-NIR Photodetection

Mianzeng Zhong,<sup>a</sup> Haotong Meng,<sup>a</sup> Zhihui Ren,<sup>b</sup> Le Huang,<sup>c</sup> Juehan Yang,<sup>b</sup> Bo Li,<sup>d</sup> Qinglin Xia,<sup>a</sup> Xiaoting Wang,<sup>b</sup> Zhongming Wei,<sup>b</sup> Jun He,<sup>\*a</sup>

<sup>a</sup>Hunan Key Laboratory of Nanophotonics and Devices, School of Physics and Electronics, Central South University, Changsha 410083, Hunan, China. E-mail: [junhe@csu.edu.cn](mailto:junhe@csu.edu.cn)

<sup>b</sup>State Key Laboratory of Superlattices and Microstructures, Institute of Semiconductors, Chinese Academy of Sciences & Center of Materials Science and Optoelectronics Engineering, University of Chinese Academy of Sciences, Beijing 100083, China. E-mail: [xiaoting13@semi.ac.cn](mailto:xiaoting13@semi.ac.cn)

<sup>c</sup>School of Materials and Energy, Guangdong University of Technology, Guangzhou 510006, China

<sup>d</sup>Department of Applied Physics, School of Physics and Electronics, Hunan University, Changsha 410082, Hunan, China

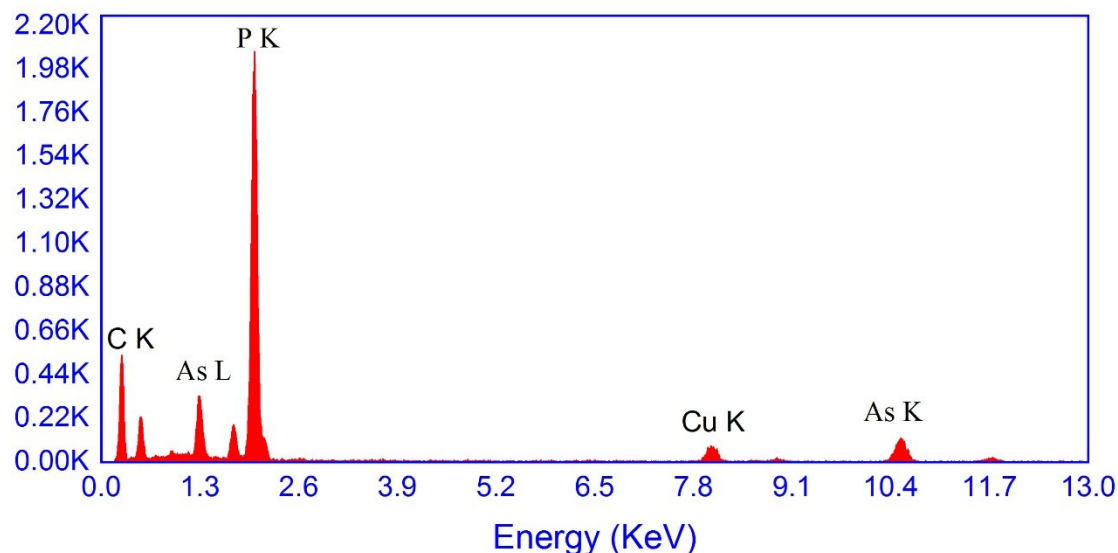

Figure S1. The representative EDX spectrum of the b-As<sub>0.084</sub>P<sub>0.916</sub> crystal. The Cu and C signals come from the copper grid.

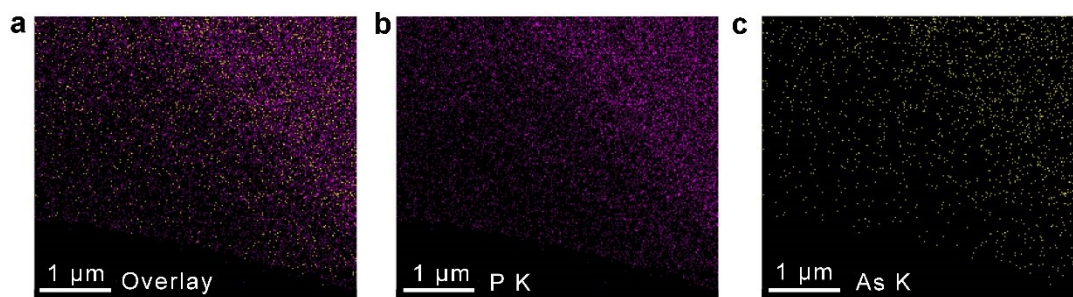

Figure S2. HAADF STEM-EDX mappings of a typical b-As<sub>0.084</sub>P<sub>0.916</sub> nanoflake reveal uniform elemental distributions.

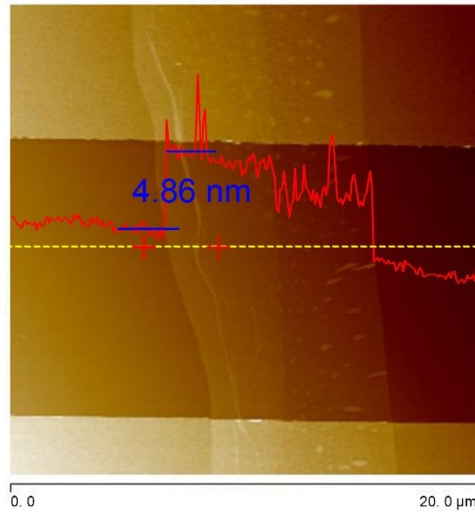

Figure S3. AFM image of a typical  $b\text{-As}_{0.084}\text{P}_{0.916}$  based FET, the thickness is 4.86 nm.

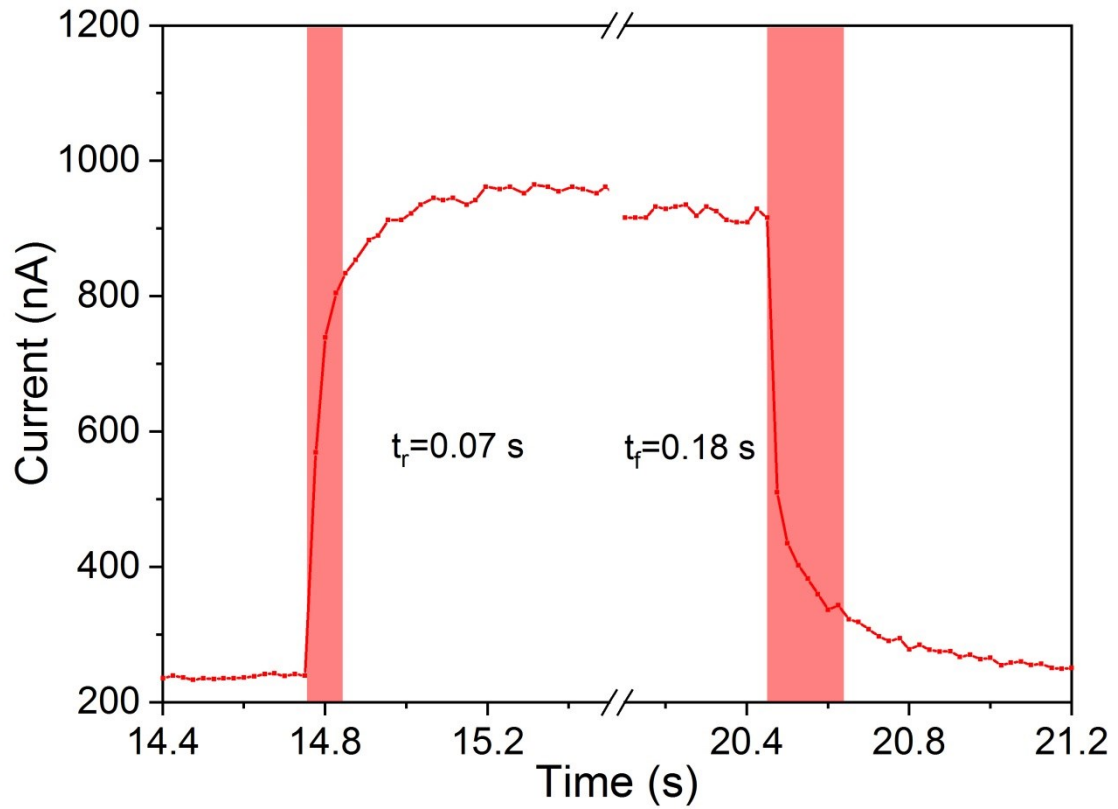

Figure S4. Photocurrent rise and decay time of this device measured at a bias voltage of 1 V and under illumination of 638 nm laser with a light intensity of  $73 \text{ mW/cm}^2$ .

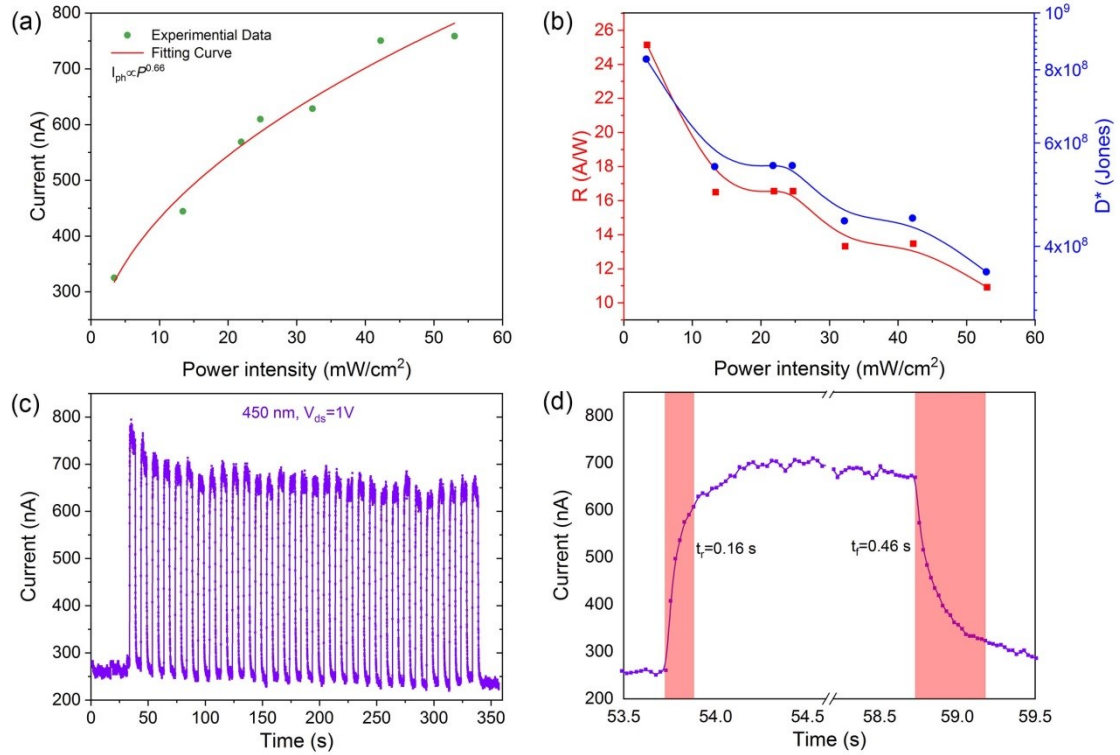

Figure S5. (a) The light power intensity dependence of the photocurrent measured with a bias voltage of 1 V under the illumination of 450nm laser; (c) Light intensity dependent responsivity and detectivity at the illumination of 450 nm laser under a bias of 1 V; (d) The photoswitching behaviour, (e) photocurrent rise and decay time of this device under illumination of 450 nm laser with a light intensity of 53 mW/cm<sup>2</sup> and a bias voltage of 1 V.

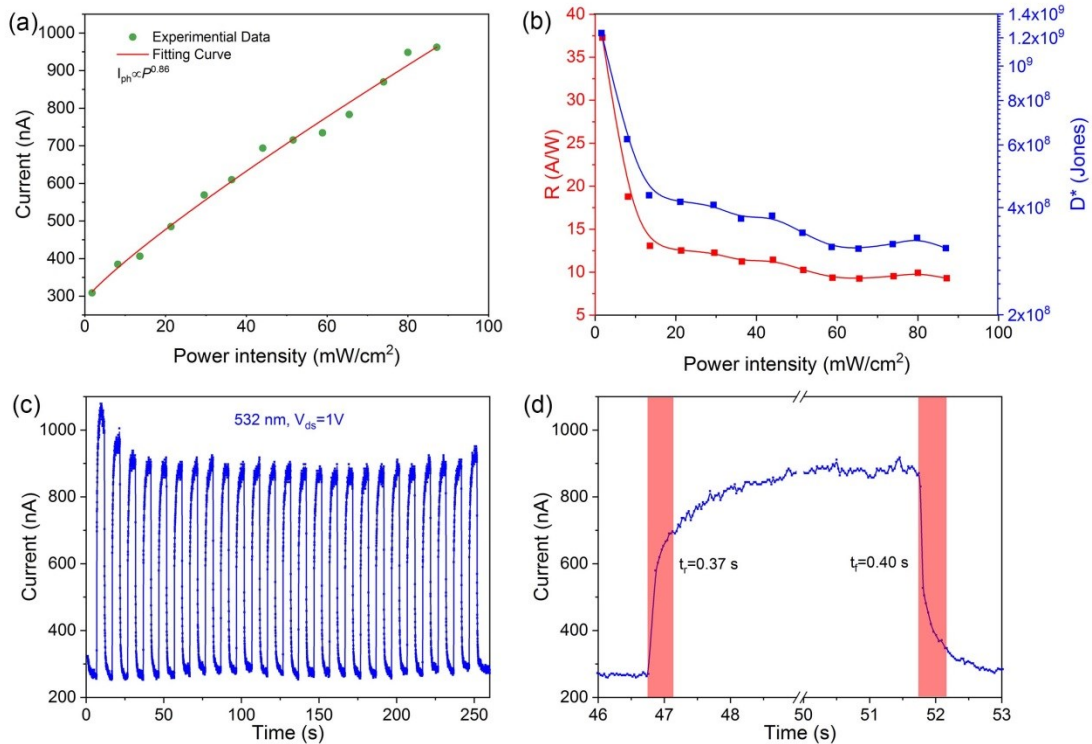

Figure S6. (a) The light power intensity dependence of the photocurrent measured with a bias voltage of 1 V under the illumination of 532nm laser; (c) Light intensity dependent responsivity and detectivity at the illumination of 532 nm laser under a bias of 1 V; (d) The photoswitching behaviour, (e) photocurrent rise and decay time of this device under illumination of 532 nm laser with a light intensity of 88 mW/cm<sup>2</sup> and a bias voltage of 1 V.

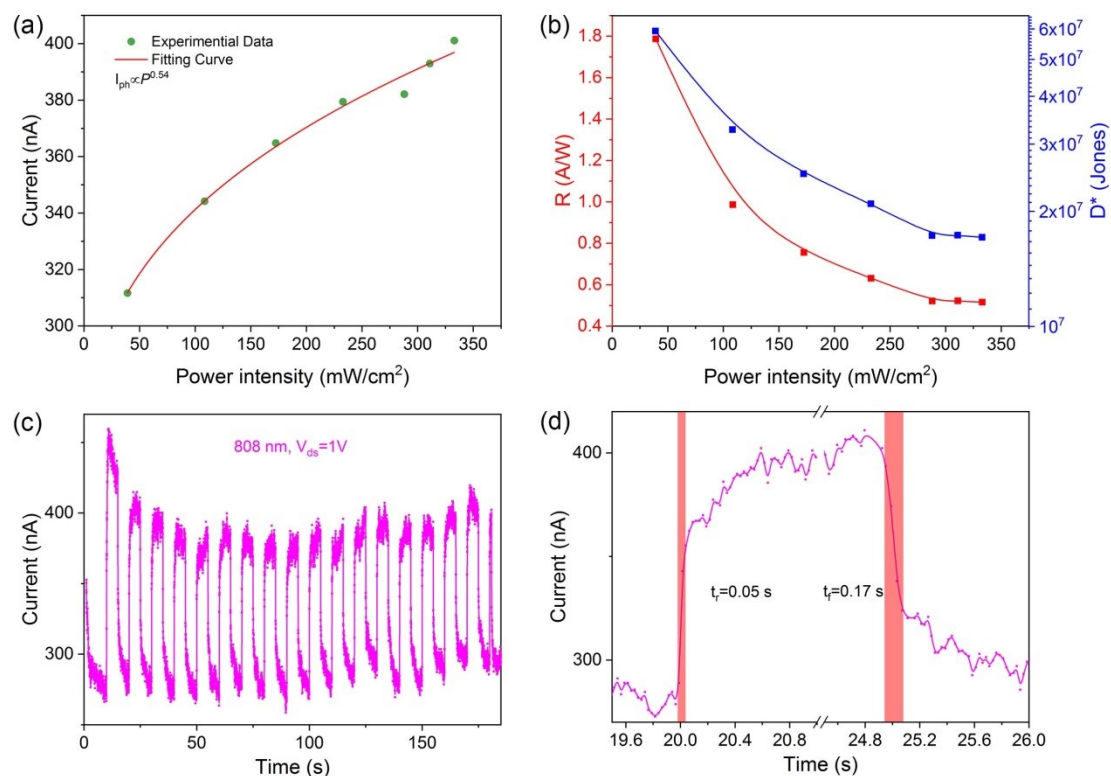

Figure S7. (a) The light power intensity dependence of the photocurrent measured with a bias voltage of 1 V under the illumination of 808nm laser; (c) Light intensity dependent responsivity and detectivity at the illumination of 808 nm laser under a bias of 1 V; (d) The photoswitching behaviour, (e) photocurrent rise and decay time of this device under illumination of 808 nm laser with a light intensity of 328 mW/cm<sup>2</sup> and a bias voltage of 1 V.

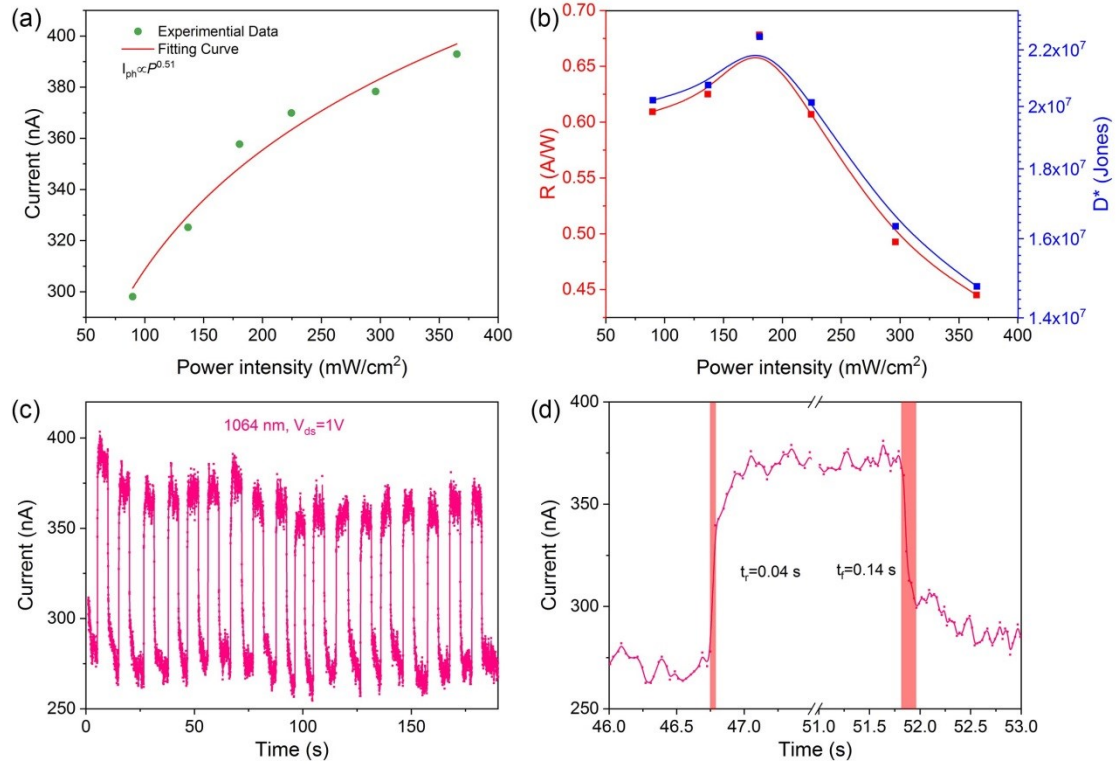

Figure S8. (a) The light power intensity dependence of the photocurrent measured with a bias voltage of 1 V under the illumination of 1064 nm laser; (c) Light intensity dependent responsivity and detectivity at the illumination of 1064 nm laser under a bias of 1 V; (d) The photoswitching behaviour, (e) photocurrent rise and decay time of this device under illumination of 1064 nm laser with a light intensity of 368 mW/cm<sup>2</sup> and a bias voltage of 1 V.

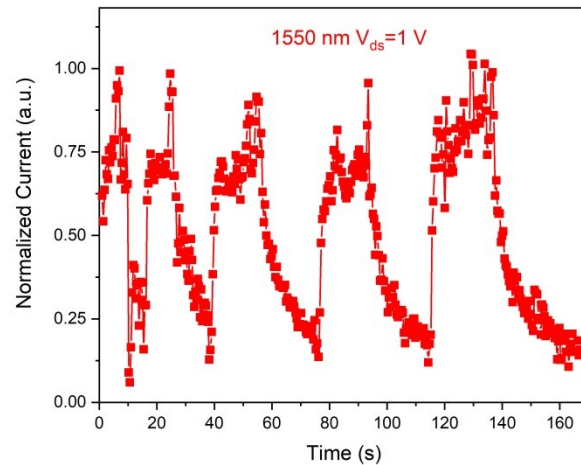

Figure S9 (a) The photoswitching behaviour of a typical device under illumination of 1550 nm with the light intensity of 72.2 mW/cm<sup>2</sup>.
